# Supplementary material for: Double carbon dot assembled mesoporous aluminas: solid-state dual-emission photoluminescence and multifunctional applications
Source: Royal Society of Chemistry journal article supplement (doi:10.1039/c8tc00182k), 2018-01-01
Supplement: c8tc00182k1.pdf [file c8tc00182k1.pdf]

# Double carbon dots assembled mesoporous aluminas: solid-state dual-emission photoluminescence and multifunctional applications

**Youling He, Jiangling He, Zhonghang Yu, Guangqi Hu, Haoran Zhang, Yingliang Liu\*, Mingtao Zheng, Hanwu Dong, Jianle Zhuang, and Bingfu Lei\***

Guangdong Provincial Engineering Technology Research Center for Optical Agriculture, College of Materials and Energy, South China Agricultural University, Guangzhou 510642, P. R. China

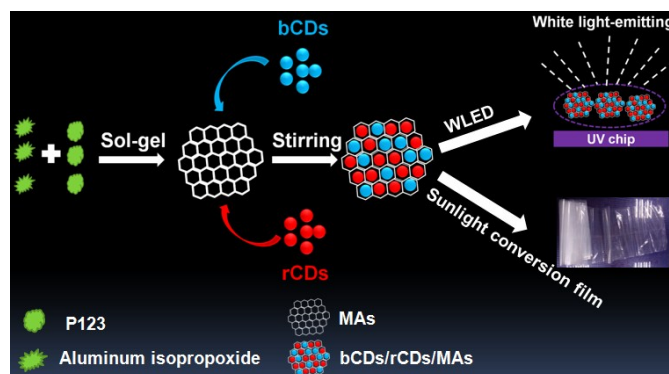

**Scheme S1.** Preparation processes of the bCDs/rCDs/MAs hybrid materials and multifunctional applications in WLED and transparent sunlight conversion film.

**Table S1.** Textural data of the MAs, the bCDs/MAs and the bCDs/rCDs/MAs co-

\* Corresponding author:

E-mail address: [tliuy1@scau.edu.cn](mailto:tliuy1@scau.edu.cn)

E-mail address: [tleibf@scau.edu.cn](mailto:tleibf@scau.edu.cn)

assembled materials.

| Sample        | BET Surface Area<br>(m <sup>2</sup> /g) | Pore Volume<br>(cm <sup>3</sup> /g) | Pore Size<br>(nm) |
|---------------|-----------------------------------------|-------------------------------------|-------------------|
| MAs           | 408.87                                  | 0.31                                | 3.2               |
| bCDs//MAs     | 351.98                                  | 0.29                                | 3.5               |
| bCDs/rCDs/MAs | 205.36                                  | 0.25                                | 5.2               |

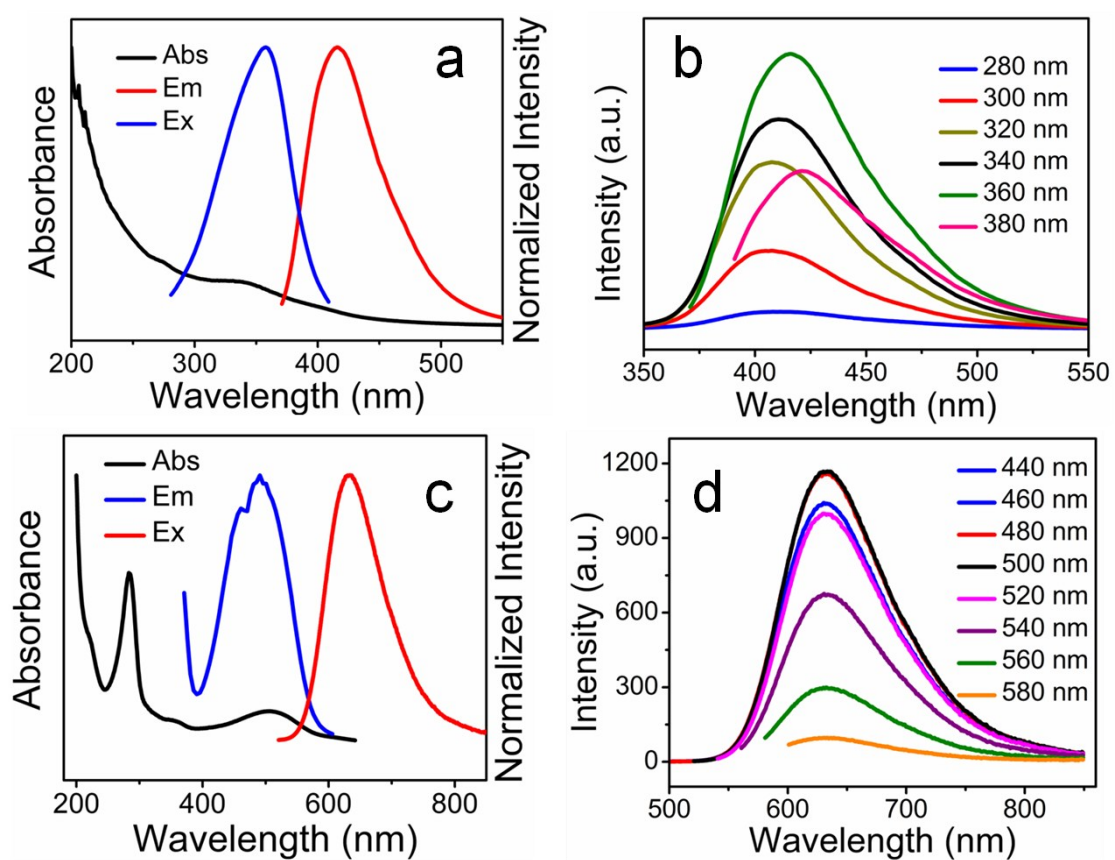

**Figure S2.** UV-vis absorption (black line), normalized PL excitation (Ex) ( $\lambda_{425} = 360$  nm, blue line), and emission (Em) ( $\lambda_{500} = 635$  nm, red line) spectra of a) bCDs and c) rCDs, respectively. PL emission spectra with different excitation wavelengths of b) bCDs and d), respectively.

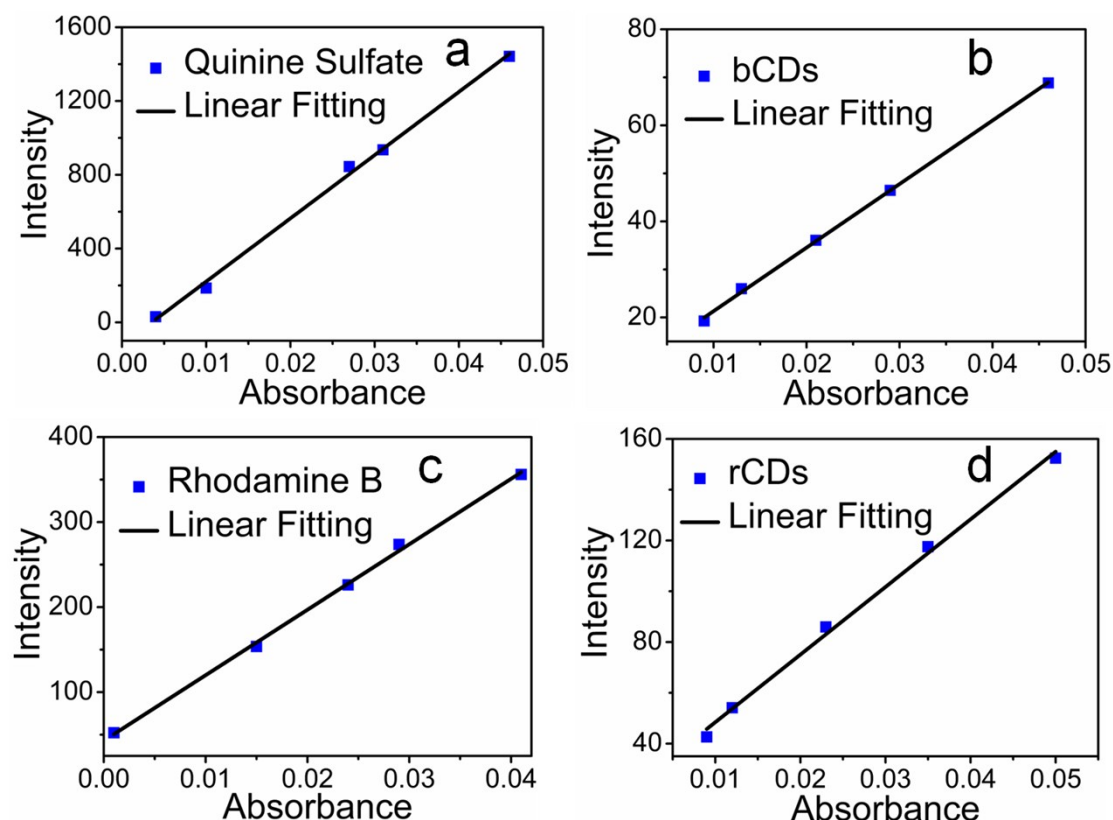

**Figure S3.** a) Plots of integrated PL intensity of quinine sulfate (referenced dye) in 0.1 mol/L  $\text{H}_2\text{SO}_4$  and b) bCDs in deionized water as a function of optical absorbance at 340 nm. c) Plots of integrated PL intensity of RCDs and d) rhodamine B (referenced dye) in deionized water as a function of optical absorbance at 500 nm.

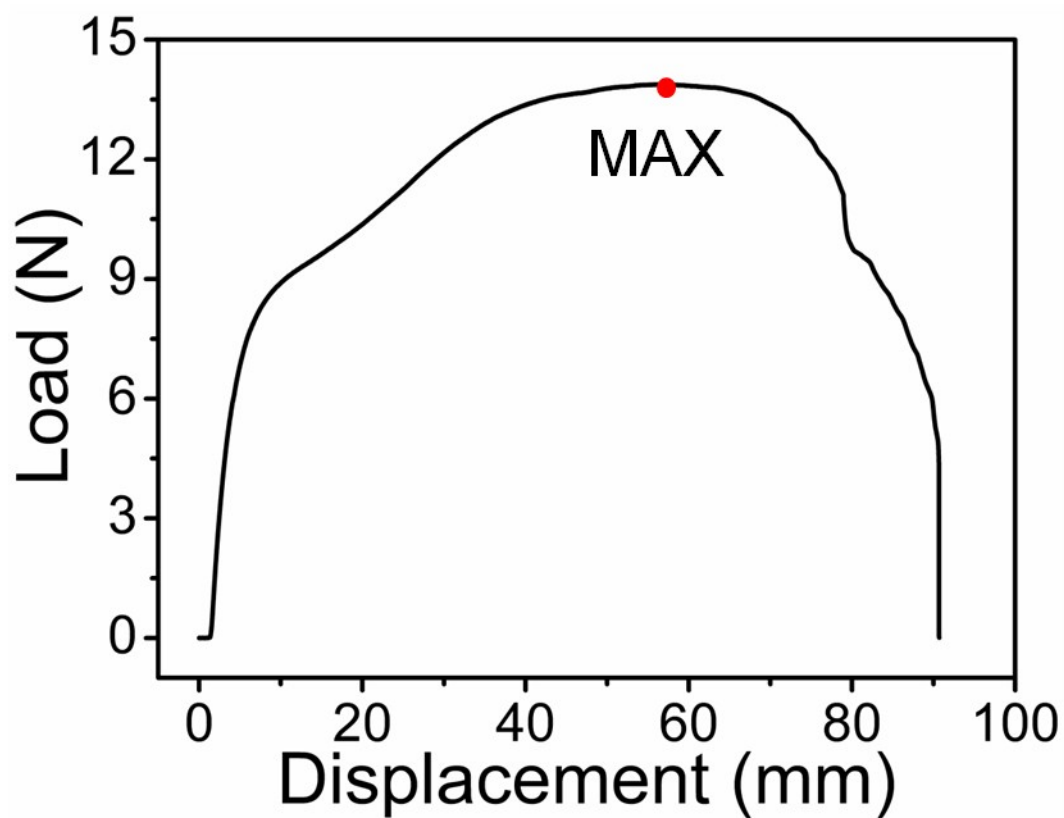

**Figure S4.** Stretching coefficient diagram of bCDs/rCDs/MAs light conversion film, inset of f): photograph of light conversion film .
